# Supplementary material for: Heat-Labile Enterotoxin Decreases Macrophage Phagocytosis of Enterotoxigenic Escherichia coli
Source: MDPI journal article supplement (doi:10.3390/microorganisms11082121), 2023-08-21
Supplement: s1 [file s1]

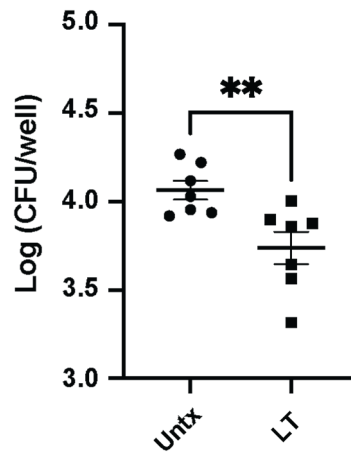

**Figure S1. LT intoxication decreases BMM phagocytosis.** BMMs ( $5 \times 10^5$  cells) were plated in 24-well cell culture plates and pretreated with LT ( $1 \mu\text{g}/\text{well}$ ) for 24 hours. Gentamicin protection assays were carried out by inoculating ETEC H10407 at MOI of 1. Data were aggregated from two individual experiments containing 3-4 replicates per experiment and analyzed via student's *t*-test. \*\*,  $p < 0.01$ .

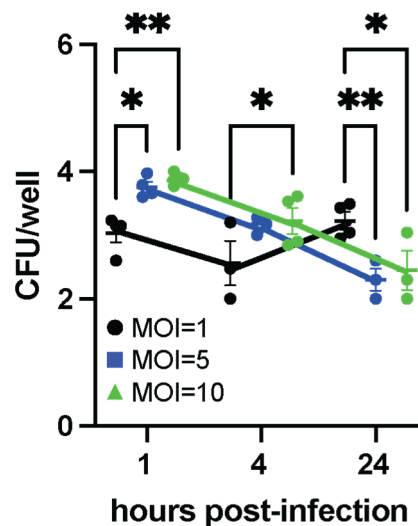

**Figure S2. Kinetics of ETEC 214-4 in Raw 264.7 macrophages.** Data are representative from one experiment with 3-4 replicates. Data were analyzed via two-way ANOVA with timepoints matched with Šídák's test for multiple comparisons. \*,  $p < 0.05$ ; \*\*,  $p < 0.01$ .

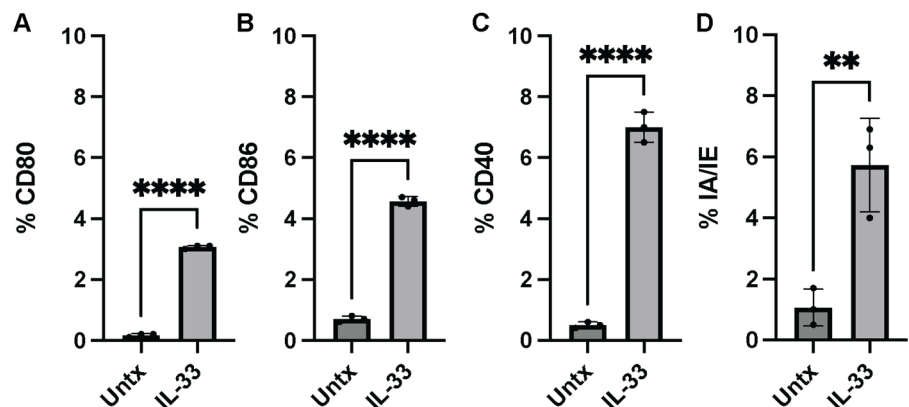

**Figure S3.** IL-33 stimulation significantly increases the expression of activation markers CD80 (A), CD86 (B), CD40 (C), and IA/IE (D) on Raw 264.7 macrophages. Raw 264.7 macrophages were stimulated with IL-33 (10 ng) or left untreated for 24 hours before being analyzed via flow cytometry. Data were aggregated from three individual experiments and statistically analyzed via the student's *t*-test,  $p < 0.01$ , \*\*,  $p < 0.0001$ , \*\*\*\*.
